# Supplementary material for: Synthesis of Fe3O4 nanocomposites for efficient separation of ultra-small oil droplets from hexadecane–water emulsions
Source: Royal Society of Chemistry journal article supplement (doi:10.1039/d0ra01044h), 2020-01-01
Supplement: d0ra01044h1.pdf [file d0ra01044h1.pdf]

## Supplementary Information

### Synthesis of Fe<sub>3</sub>O<sub>4</sub> nanocomposites for efficient separation of ultra-small oil droplets from hexadecane–water emulsions

Tianwen Mi, Yuxuan Cai, Qing Wang, Nuzahat Habibul, Xiaoli Ma, Zhi Su, Wei Wu \*

*College of Chemistry and Chemical Engineering, Xinjiang Normal University, 830054,*

*Urumqi, China*

\*Corresponding author. E-mail: [wuwei0523@sina.cn](mailto:wuwei0523@sina.cn) (Wei Wu)

#### 1. Characterization of Fe<sub>3</sub>O<sub>4</sub>@PDDA

PDDA-modified Fe<sub>3</sub>O<sub>4</sub> NPs were prepared using previously reported methods [1]. The XRD diagram for Fe<sub>3</sub>O<sub>4</sub>@PDDA (Fig. S1) shows that the material has diffractions of (220), (311), (400), (511), (440) and is consistent with the standard card (JCPDS NO. 19-0629), indicating the cubic spinel structure of Fe<sub>3</sub>O<sub>4</sub>.

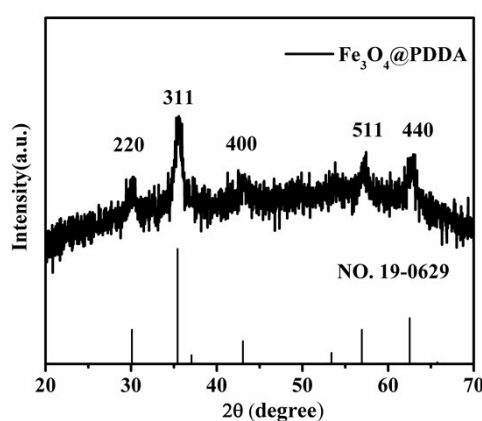

Fig. S1 XRD patterns of Fe<sub>3</sub>O<sub>4</sub>@PDDA samples.

The TEM image (Fig. S2A) shows that the Fe<sub>3</sub>O<sub>4</sub>@PDDA NPs are agglomerate and non-spherical. The SEM image (Fig. S2B) confirmed that the samples had

particle sized about 20–40 nm. The results of DLS (Fig. S3) showed that the average particle size of Fe<sub>3</sub>O<sub>4</sub>@PDDA NPs was 138.4 (±11.5) nm.

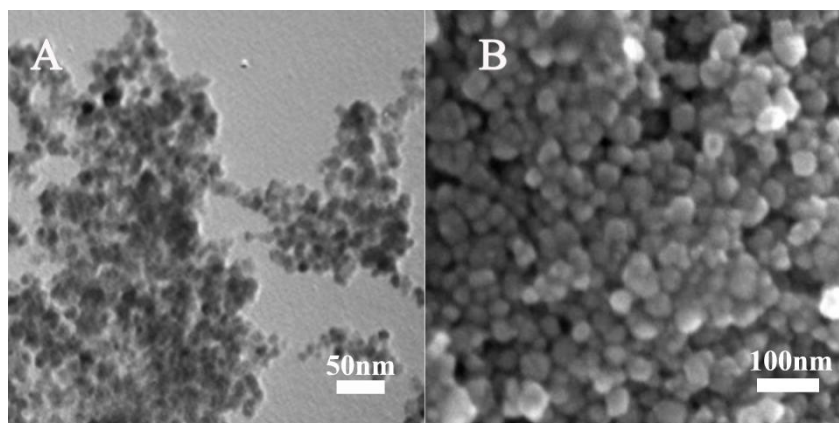

Fig. S2 TEM image and SEM image of Fe<sub>3</sub>O<sub>4</sub>@PDDA samples

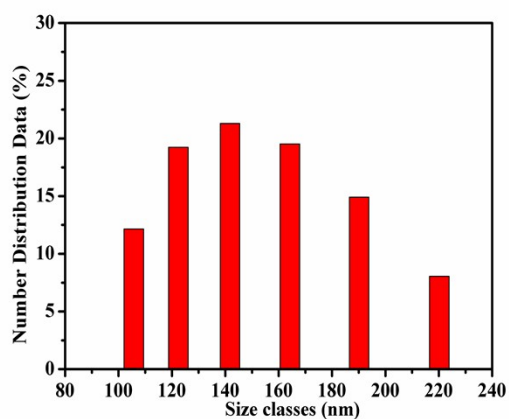

Fig. S3 Particle size distribution of Fe<sub>3</sub>O<sub>4</sub>@PDDA NPs

## 2. Particle size distribution of emulsion

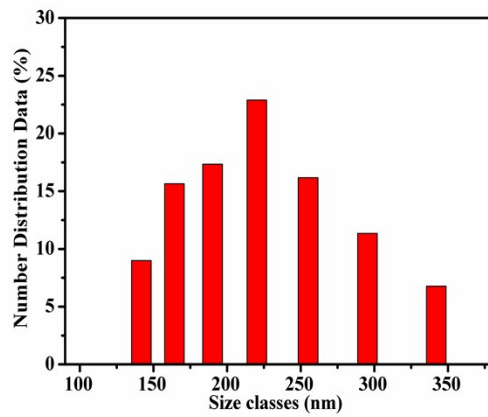

Fig. S4 Particle size distribution of hexadecane-water emulsion

### 3. Oil-water separation performance of magnetic nanoparticles (MNPs)

Fig. S5 shows that  $E_S$  reaches equilibrium when the shaking time was 150 min. For the hexadecane-water emulsion without MNPs, the change of  $E_S$  is almost zero with the change of shaking time, which also shows that the emulsion is stable in the range of shaking time.

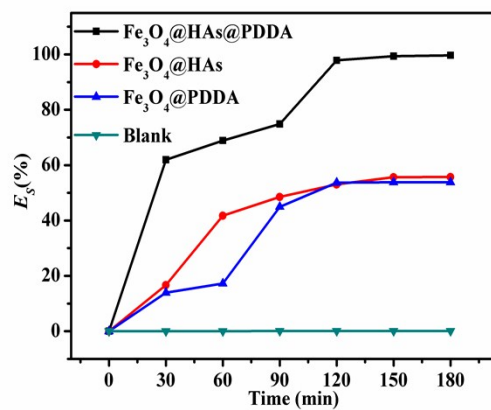

Fig. S5 The effect of magnetic nanoparticle shaking time on  $E_S$  in O/W emulsion

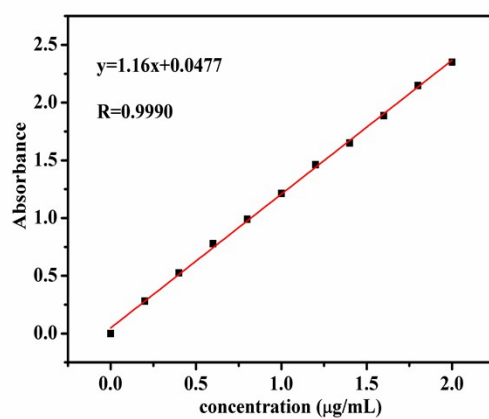

Fig. S6 Standard curve of hexadecane emulsion

### References:

- 1 J. Chen, Y. Ju and H. Chen, *NANO*, 2019, **14**, 1950019-1950033.
